# Supplementary material for: Pristine carbon nitride as active material for high-performance metal-free supercapacitors: simple, easy and cheap
Source: Royal Society of Chemistry journal article supplement (doi:10.1039/c8ra06656f), 2018-01-01
Supplement: c8ra06656f1.pdf [file c8ra06656f1.pdf]

# Pristine carbon nitride as active material for high-performance metal-free supercapacitors: simple, easy and cheap

## (Supplementary Information)

Roger Gonçalves,<sup>1</sup> Thiago M. Lima,<sup>2,3</sup> Márcio W. Paixão<sup>2</sup> and Ernesto C. Pereira<sup>1\*</sup>

<sup>1</sup> Center for the Development of Functional Materials (CDMF), Department of Chemistry, Federal University of São Carlos, Mail Box 676, CEP 13565-905, São Carlos – SP, Brazil.

<sup>2</sup> Inorganic Chemistry Department, Federal Fluminense University, CEP 24020-150, Niterói – RJ, Brazil.

<sup>3</sup> Center of Excellence for Research in Sustainable Chemistry (CERSusChem), Department of Chemistry, Federal University of São Carlos, Mail Box 676, CEP 13565-905, São Carlos – SP, Brazil.

\* *Corresponding author:* ernesto@ufscar.br

### S.I.1 - UREA XRD AND FTIR SPECTRA

As described in the experimental part, the XRD pattern and FTIR spectrum were obtained for the urea used as starting material to produce the  $C_3N_4$ . Figure S.1a presents the diffraction peaks for this material, with is according to the literature for a polycrystalline urea pattern[1]. In addition, Figure S.1b shows the vibrational spectrum with the characteristic bands for this material as reported in the literature[2,3].

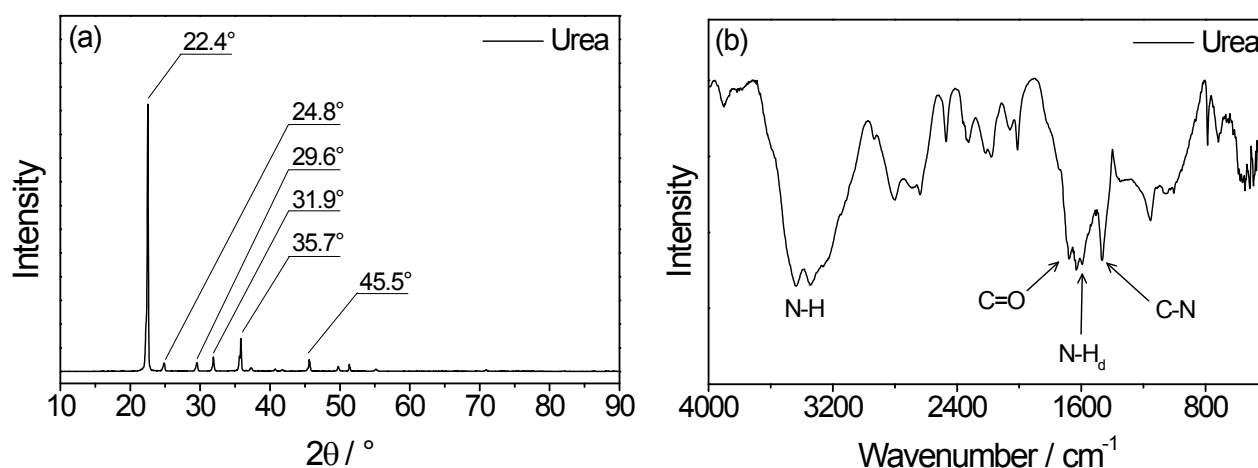

**Figure S.1:** Urea (a) x-ray diffractogram and (b) infrared spectrum.

Figure S.2 present the comparison between the urea and the exfoliated  $C_3N_4$  diffractograms and infrared spectra. For a better visualization, the carbon nitride data had to be multiplied by 100 to be comparable to the urea one. In addition, it is possible to see that the characteristic peak of urea in  $22.4^\circ$  does not appear in the nitrate diffractogram and not even as peaks with very low intensities. On the other hand, infrared spectra, although having certain characteristics in common, due to the chemical bonds present in both materials, mainly the bands around  $300\text{ cm}^{-1}$  related to C-H bonds cannot be seen in the  $C_3N_4$  spectrum, suggesting that all the urea used as a precursor was converted to carbon nitride.

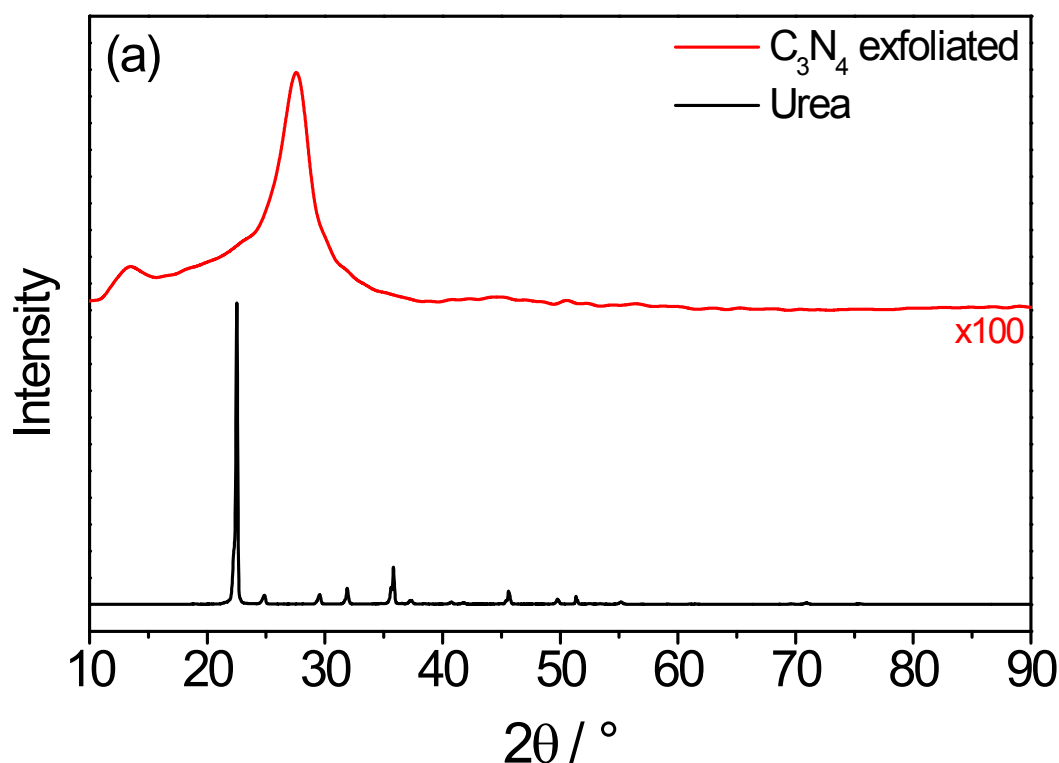

**Figure S.2:** Urea (a) X-ray diffractogram and (b) infrared spectrum.

### S.I.2 - THERMAL GRAVIMETRIC ANALYSIS

The thermal analysis of the urea and carbon nitride were performed to verify the thermal behavior of these two materials and aiming to analyze the presence of undecomposed urea in the carbon nitride sample. Figure S.3 shows the weight loss curve plotted together with the first derivative (DTG) of the TGA curve, which makes it possible to see how many and at what temperatures each transformation occurs. Thus, the urea weight loss curve shows two distinct events in which the first one occurs from  $150^\circ\text{C}$  to  $275^\circ\text{C}$  and the second in the range from  $275^\circ\text{C}$  to  $475^\circ\text{C}$ . Furthermore, the DTG curves shows two endothermic peaks centered at  $234^\circ\text{C}$  and  $364^\circ\text{C}$ , being the first event assigned to the formation of biuret compound and the second one assigned to the formation of melamine [4,5].

The carbon nitride weight loss curve shows two distinct events, in which the first one occurs in the range from  $50^\circ\text{C}$  to  $150^\circ\text{C}$  being assigned to the desorption of physically adsorbed water molecules. The second weigh loss event occurs in the range from  $525^\circ\text{C}$  to  $775^\circ\text{C}$  (centered at

688 °C) is assigned to the degradation of carbon nitride structure, as already reported in the literature [6,7].

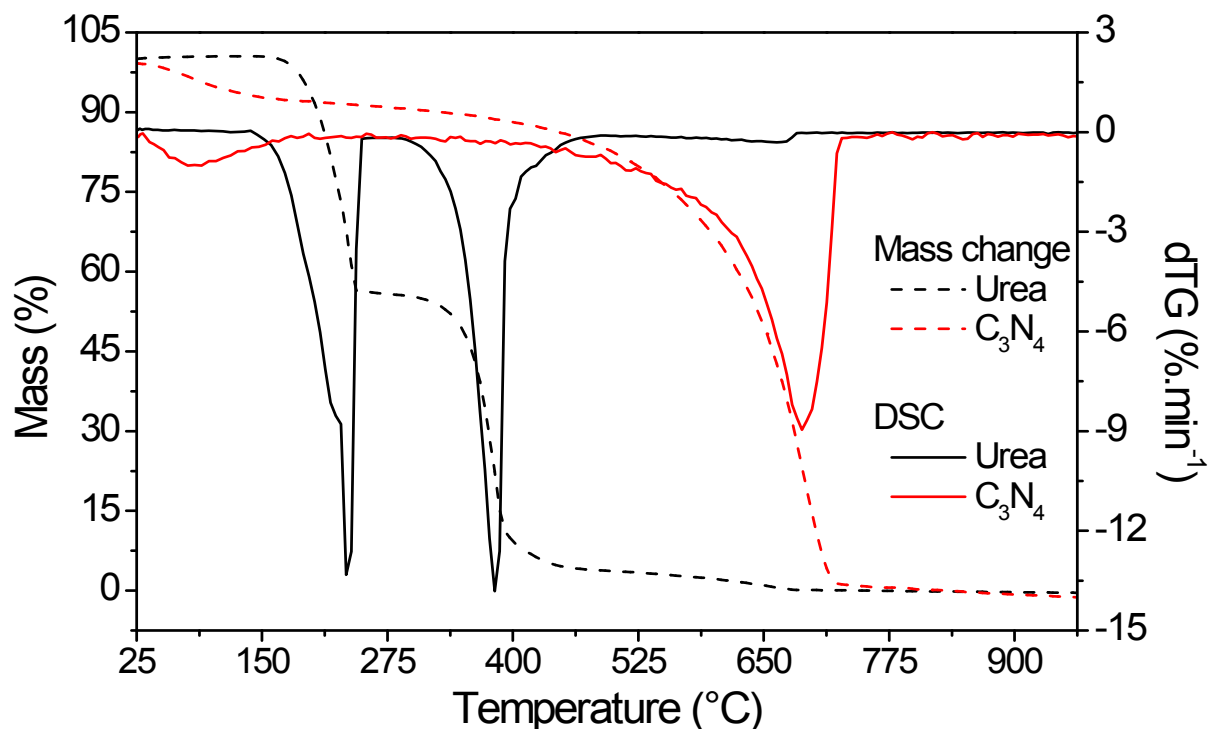

**Figure S.3:** Weight loss curve and first derivative of the DTG for urea and C<sub>3</sub>N<sub>4</sub>.

### S.I.3 - ENERGY DISPERSIVE X-RAY SPECTROSCOPY

To ensure the purity of the obtained carbon nitride and the complete conversion of the urea, an elemental characterization using Energy Dispersive X-ray (EDX) was performed on both, urea and C<sub>3</sub>N<sub>4</sub>. This measurement allowed obtaining the atomic composition of the samples. Figure S.4 shows the energy spectra, where it is possible to observe that there was not found any O peak on the urea sample while in the carbon nitride there is just C and N as expected.

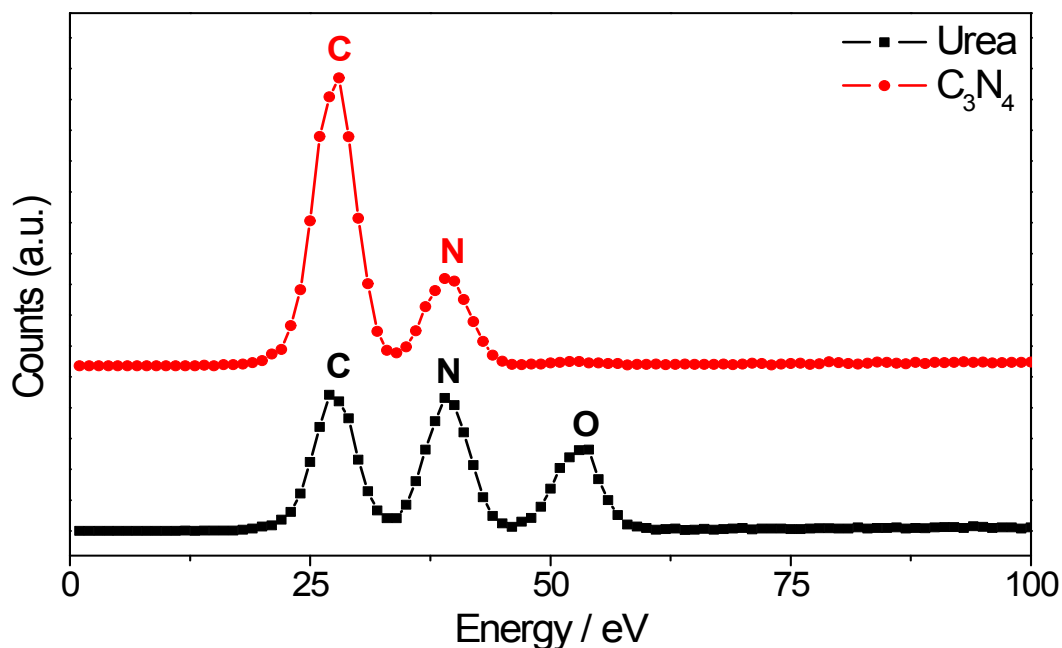

**Figure S.4:** Energy dispersive x-ray spectra for urea and exfoliated  $C_3N_4$ .

In addition, Table S.1 resumes the proportion of elements in the samples with the calculated standard deviation calculated considering different regions of the same sample. The urea empirical formula of urea is  $CH_4N_2O$ , it means that the proportion C:N:O is 1:2:1; while carbon nitrides present the empirical formula as  $C_3N_4$  and proportion C:N:O, 3:4:0. Thus, as calculated by the EDS data was found the proportions for urea and carbon nitride 0.96:1.87:1.17 and 2.84:4.16:0.0, respectively. These results are in perfectly agreement with the expected for the  $C_3N_4$  precursor and for urea-free carbon nitride.

**Table S.1:** Atomic proportions of carbon, nitrogen and oxygen obtained by EDS.

| Elements            | Urea      | Carbon nitride |
|---------------------|-----------|----------------|
| <i>Carbon (%)</i>   | 24.0±0.18 | 40.6±0.78      |
| <i>Nitrogen (%)</i> | 46.6±0.28 | 59.4±0.78      |
| <i>Oxigen (%)</i>   | 29.4±0.10 | -              |
| <i>Total</i>        | 100%      | 100%           |

#### S.I.4 - N<sub>2</sub> SORPTION MEASUREMENTS

The nitrogen adsorption-desorption measurements (Figure S.5) were performed in order to obtain insights regarding the textural properties of the bulk g-C<sub>3</sub>N<sub>4</sub> and the exfoliated material. Both materials presented type IV isotherms, typical of mesoporous solids in which the nitrogen adsorption proceeds via multilayer adsorption followed by capillary condensation[8]. Furthermore, the hysteresis loops of both materials are classified as H3 type, characteristic of layered materials with slit-shaped pores as a consequence of the aggregation of the flake shaped particles[8,9].

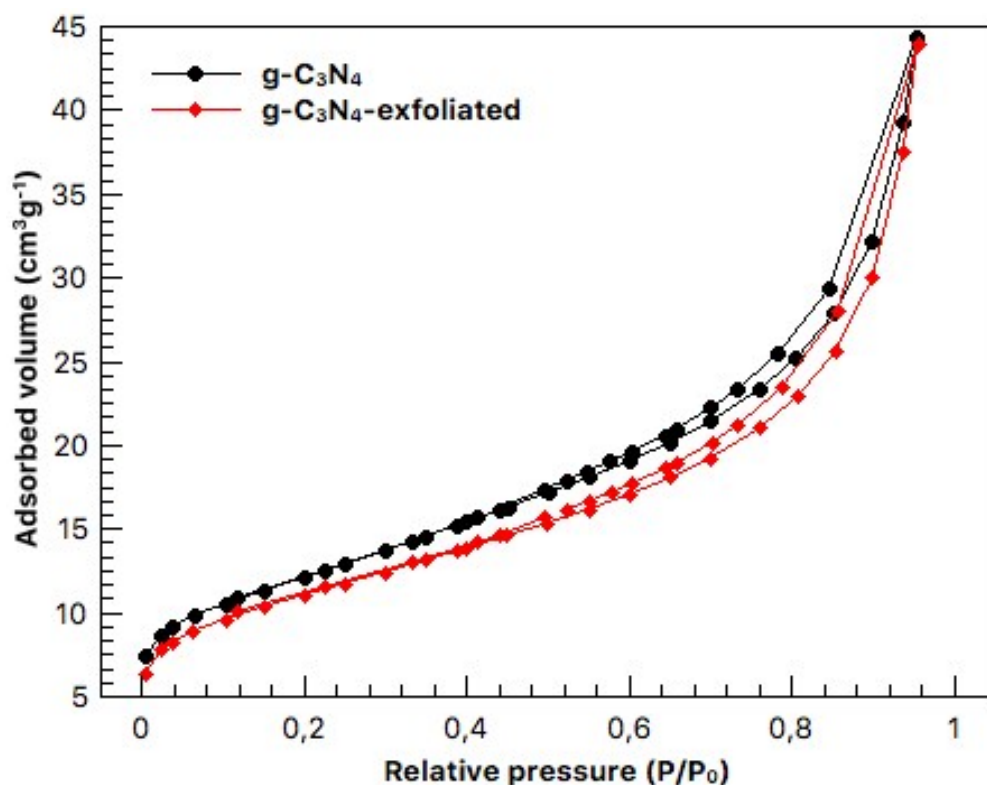

**Figure S.5:** Adsorption-desorption N<sub>2</sub> isotherms for the g-C<sub>3</sub>N<sub>4</sub> and exfoliated C<sub>3</sub>N<sub>4</sub>.

Interestingly, the specific surface area of the non and exfoliated carbon nitride materials were similar, as evidenced in Table S.2. This behavior is assigned to the reversibility of the exfoliation method employing isopropanol, in which the exfoliated morphology is kept in solution and the drying procedure led to the re-stacking of graphite-like C<sub>3</sub>N<sub>4</sub> layers in a disordered way as a

consequence of the solvent evaporation[10]. Furthermore, the re-stacking is followed by a slightly increase in the volume and diameter of the slit-shaped pores, as observed in the Table S.2.

**Table S.2:** Textural properties of the g-C<sub>3</sub>N<sub>4</sub> and the exfoliated C<sub>3</sub>N<sub>4</sub>.

| Sample                                   | S <sub>B.E.T.</sub> (m <sup>2</sup> g <sup>-1</sup> ) | D <sub>B.J.H.</sub> (nm) | V <sub>p</sub> (cm <sup>3</sup> g <sup>-1</sup> ) |
|------------------------------------------|-------------------------------------------------------|--------------------------|---------------------------------------------------|
| g-C <sub>3</sub> N <sub>4</sub>          | 36.7                                                  | 6.7                      | 0.04                                              |
| C <sub>3</sub> N <sub>4</sub> exfoliated | 38.5                                                  | 8.0                      | 0.06                                              |

### S.I.5 - EIS MODEL AND PARAMETERS BEHAVIOR VERSUS CYCLES NUMBER

As described in the manuscript, Figure S.6a shows the transmission line model used to fit the impedance data. To understand the aging behavior of the film, the parameters obtained from the model was plotted in function of the charge/discharge cycles. The capacitance of the double-layer decreases (Figure S.6b) almost five times due the cycles number, these parameters associated with the decrease in the pore resistance (Figure S.6d), could suggest that the film is lixiviated from the electrode, since the normal behavior is increase with the number of cycles. In addition to the film show a slightly increase resistance (Figure S.6e). This supposition can also explain the other curves obtained, with a less amount of electroactive film weight, both capacitance value decreases and the intercalation process (Figure S.6c) also occur in minor extension.

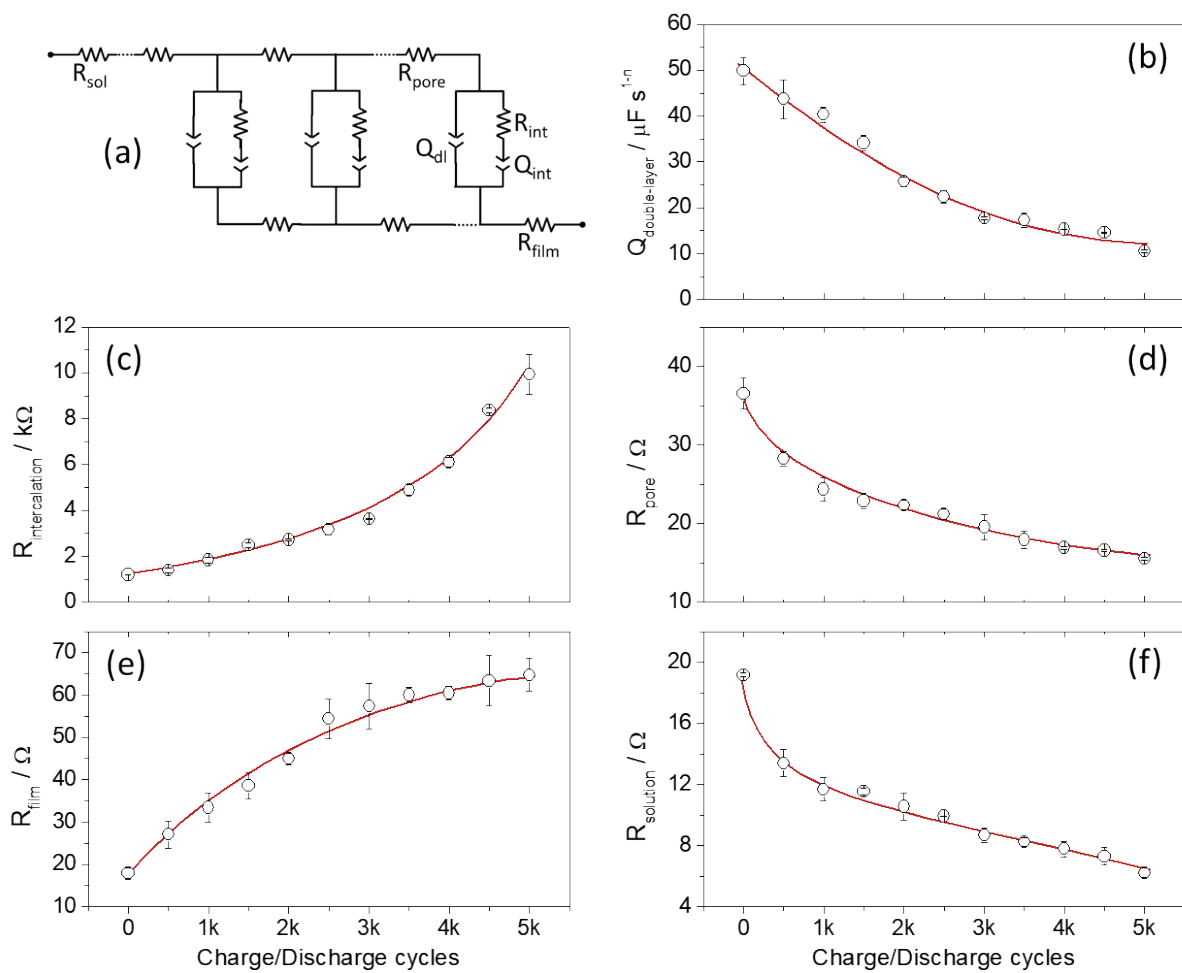

**Figure S.6:** (a) Model used to fit the EIS data; (b) double-layer capacitance, (c) intercalation (mas transport) resistance, (d) pore resistance, (e) film ( $C_3N_4$ ) resistance and (f) solution resistance versus charge/discharge cycles.



## REFERENCES

- [1] P.B. V. Prasad, G.S. Rao, Powder XRD Study on Urea - Biuret (Habit Modifier) System, *Cryst. Res. Technol.* 27 (1992) K105–K107. doi:10.1002/crat.2170270725.
- [2] R. Keuleers, H.O. Desseyn, B. Rousseau, C. Van Alsenoy, Vibrational Analysis of Urea, *J. Phys. Chem. A.* 103 (1999) 4621–4630. doi:10.1021/jp984180z.
- [3] Z. Piasek, T. Urbanski, The Infra-red Absorption Spectrum and Structure of Urea, *Bull. L'Academie Pol. Des Sci. X* (1962) 113–120.
- [4] F. Chemat, M. Poux, Microwave assisted pyrolysis of urea supported on graphite under solvent-free conditions, *Tetrahedron Lett.* 42 (2001) 3693–3695. doi:10.1016/S0040-4039(01)00545-7.
- [5] A.M. Wynne, The thermal decomposition of urea: An undergraduate thermal analysis experiment, *J. Chem. Educ.* 64 (1987) 180. doi:10.1021/ed064p180.
- [6] J. Zhu, P. Xiao, H. Li, A.C. Carabineiro, Graphitic Carbon Nitride : Synthesis , Properties , and Applications in Catalysis, (2014).
- [7] W.J. Ong, L.L. Tan, Y.H. Ng, S.T. Yong, S.P. Chai, Graphitic Carbon Nitride (g-C<sub>3</sub>N<sub>4</sub>)-Based Photocatalysts for Artificial Photosynthesis and Environmental Remediation: Are We a Step Closer to Achieving Sustainability?, *Chem. Rev.* 116 (2016) 7159–7329. doi:10.1021/acs.chemrev.6b00075.
- [8] F. Rouquerol, J. Rouquerol, K. Sing, Interpretation of Physisorption Isotherms at the Gas–Solid Interface, in: *Adsorpt. by Powders Porous Solids*, Elsevier, 1999: pp. 93–115. doi:10.1016/B978-012598920-6/50005-1.
- [9] M. Thommes, K. Kaneko, A. V. Neimark, J.P. Olivier, F. Rodriguez-Reinoso, J. Rouquerol, et al., Physisorption of gases, with special reference to the evaluation of surface area and pore size distribution (IUPAC Technical Report), *Pure Appl. Chem.* 87 (2015). doi:10.1515/pac-2014-1117.
- [10] H. Sun, X. Zhou, H. Zhang, W. Tu, An efficient exfoliation method to obtain graphitic carbon nitride nanosheets with superior visible-light photocatalytic activity, *Int. J. Hydrogen Energy.* 42 (2017) 7930–7937. doi:10.1016/j.ijhydene.2016.12.080.
